# Supplementary figures and images for: Attachment of phosphonate-functionalised azo-dyes to oxide surfaces to give enhanced light and wet fastness
Source: Royal Society of Chemistry journal article supplement (doi:10.1039/b303608c), 2003-01-01

ROESY NMR spectrum of **1** and  $\alpha$ -cyclodextrin ( $0.05 \text{ mol dm}^{-3}$ ) in  $\text{D}_2\text{O}$

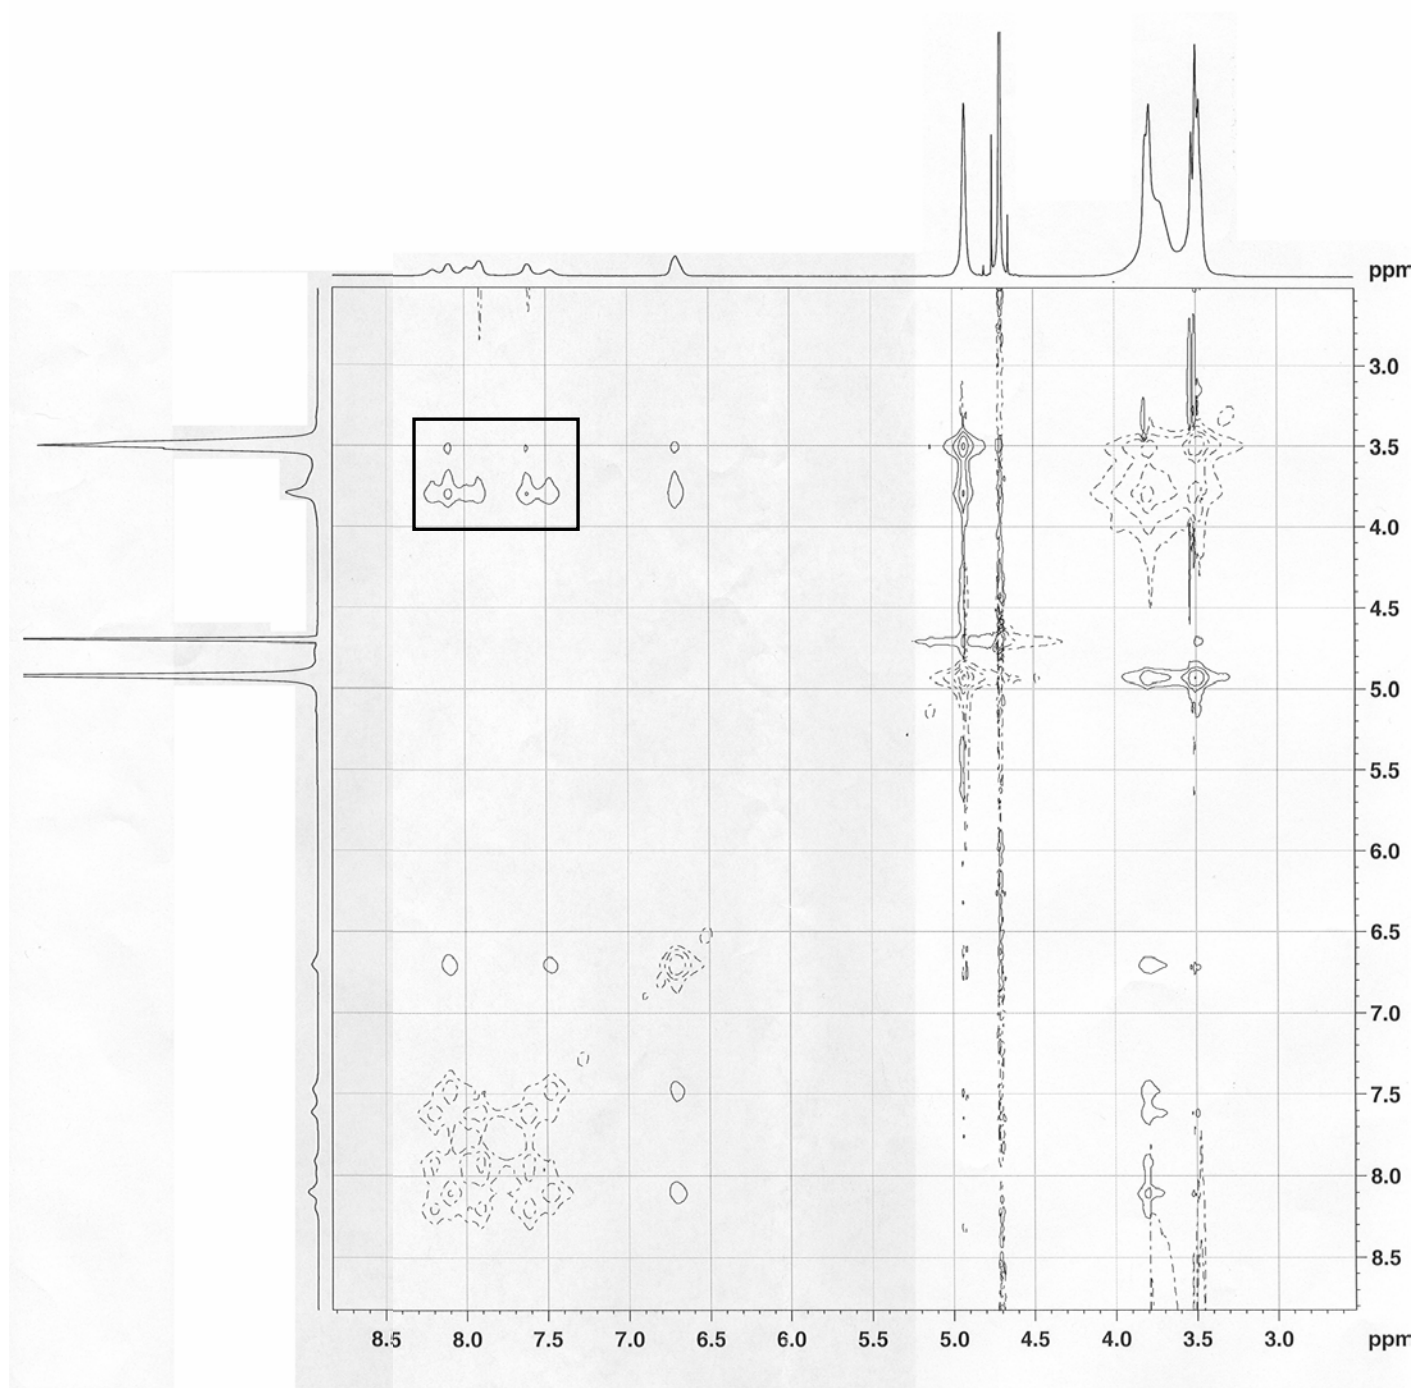

Supplement: b303608c.pdf [file b303608c.pdf]
